# Supplementary figures and images for: Anopheles salivary antigens as serological biomarkers of vector exposure and malaria transmission: A systematic review with multilevel modelling
Source: eLife journal article supplement (doi:10.7554/elife.73080), 2021-12-22

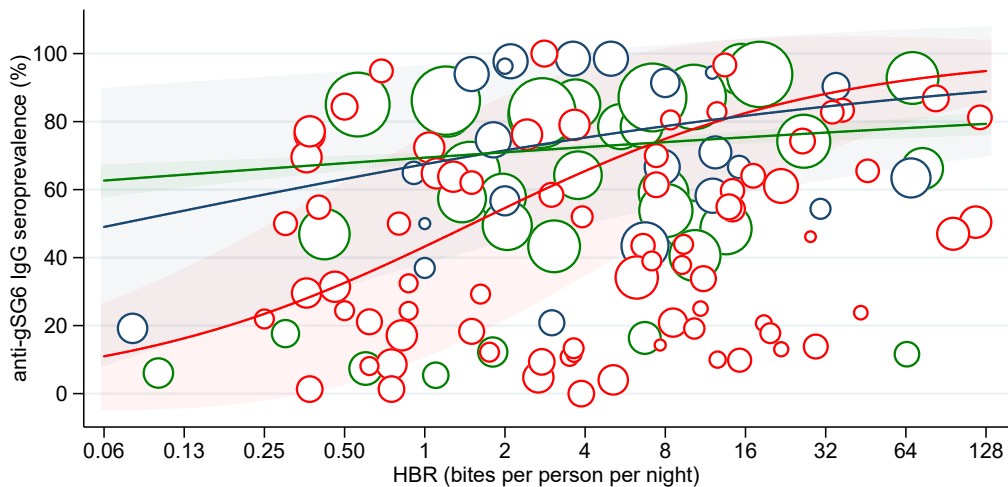

Supplement: supp [file elife-73080-supp-v1.zip]
